# Supplementary material
Source: publisher figshare collection journal article supplement (https://frontiersin.figshare.com/ndownloader/files/29153241)
Supplement: Supplementary file 1 [file 29153241]

## Sheet: c
remperature	north region	south region	precipitation	north region	south region	radiation	north region	south region	CO2	north region	south region
1981	321.746	264.086		123.935	171.258		264.291	192.037		420.216	277.85
1982	322.528	264.019		125.127	157.632		263.368	198.772		421.41	278.884
1983	320.536	263.732		147.389	163.75		250.945	190.925		423.014	280.143
1984	320.858	263.592		138.782	177.981		250.541	190.138		425.199	281.086
1985	321.65	263.669		127.231	211.623		264.897	181.73		426.395	282.018
1986	320.694	263.963		144.687	180.559		256.191	188.807		428.531	283.42
1987	321.222	263.497		131.893	226.92		253.306	173.696		430.961	284.946
1988	322.565	264.137		130.899	179.599		259.086	192.262		432.086	285.976
1989	321.692	264.601		156.42	181.774		254.686	193.89		434.763	287.452
1990	322.376	263.971		132.113	160.244		258.905	193.911		435.477	288.493
1991	321.04	263.573		101.518	155.96		258.956	188.842		437.45	289.559
1992	320.695	263.177		136.496	206.772		247.066	175.358		439.447	290.687
1993	320.79	263.329		143.479	174.653		251.827	185.987		441.147	291.674
1994	320.515	263.436		115.98	184.013		251.965	182.256		441.987	292.349
1995	321.164	263.639		135.499	170.649		253.171	184.826		443.692	293.546
1996	321.901	264.125		155.898	160.758		254.183	186.109		445.214	294.614
1997	322.297	264.174		143.125	187.467		254.123	190.839		447.146	295.968
1998	321.21	264.075		133.717	195.978		248.112	182.258		449.011	296.879
1999	321.972	263.456		124.99	223.972		259.219	177.297		450.697	297.904
2000	322.134	263.79		123.705	177.595		252.456	186.782		452.685	299.466
2001	322.82	264.131		117.79	163.694		264.263	196.469		453.594	300.387
2002	322.88	264.354		110.328	192.756		262.154	187.517		456.808	302.148
2003	323.271	264.214		123.713	168.868		247.355	190.484		459.501	303.396
2004	323.036	264.399		147.888	160.762		252.613	187.852		461.619	305.322
2005	321.882	263.95		123.629	172.022		256.896	183.719		463.136	306.941
2006	322.706	264.589		140.993	173.767		244.924	188.868		466.67	308.544
2007	321.968	264.001		109.366	193.151		254.594	182.837		467.893	310.021
2008	321.62	264.018		131.287	182.713		248.279	181.325		471.178	312.165
2009	322.093	264.226		143.288	226.906		248.15	177.486		473.984	313.583
2010	324.199	264.553		128.857	161.277		251.206	190.041		477.007	315.775
2011	323.412	264.041		118.551	166.583		251.866	186.505		480.446	317.735
2012	322.831	264.132		121.928	174.138		258.576	177.559		484.541	320.591
2013	322.709	264.368		143.196	201.062		251.765	180.914		488.049	323.054
2014	322.999	264.865		173.584	166.398		237.451	185.574		490.393	324.97

## Sheet: G
remperature	north region	south region	precipitation	north region	south region	radiation	north region	south region	CO2	north region	south region
1981	317.522	260.037		109.454	144.879		223.55	178.221		368.928	256.915
1982	317.695	260.362		104.686	144.18		235.205	180.52		371.995	258.372
1983	316.848	259.922		103.696	123.957		229.878	181.199		372.312	258.311
1984	316.81	259.443		107.347	150.547		228.756	174.557		373.496	259.029
1985	317.023	259.763		108.154	140.111		225.561	180.785		375.67	260.465
1986	318.144	259.602		83.4504	140.249		239.312	171.505		377.192	261.411
1987	317.232	259.844		108.544	142.154		232.135	176.788		378.747	262.481
1988	317.318	260.132		106.643	128.124		227.468	176.605		380.373	264.473
1989	318.021	260.197		120.015	137.88		225.971	176.571		382.321	265.16
1990	317.859	260.319		100.984	132.33		227.326	179.612		384.926	267.776
1991	317.956	260.038		98.0737	143.523		228.476	170.55		386.98	268.211
1992	317.752	259.696		91.1649	124.3		227.519	176.488		388.589	269.103
1993	317.325	259.865		93.7746	115.858		231.227	180.648		388.13	269.265
1994	317.074	260.162		105.016	138.422		224.551	170.666		390.082	270.954
1995	317.364	259.612		99.0025	142.972		222.492	167.089		391.564	271.864
1996	317.721	259.937		118.431	134.936		222.373	175.424		392.094	271.952
1997	317.807	260.17		107.144	144.059		220.546	171.291		393.232	272.696
1998	317.849	260.106		104.989	128.049		224.665	176.342		395.639	274.824
1999	317.819	260.008		103.576	133.184		221.055	171.175		398.082	275.818
2000	318.283	260.04		90.8436	145.132		234.012	172.66		400.109	277.892
2001	318.616	260.527		83.8064	106.34		233.117	183.328		402.832	280.102
2002	318.207	260.503		116.865	137.499		219.134	175.766		404.814	280.75
2003	317.202	260.421		105.189	113.738		206.284	182.603		405.635	281.342
2004	318.151	260.243		87.0141	134.898		224.934	161.772		408.441	283.699
2005	317.923	260.754		110.952	119.466		214.417	172.599		410.599	284.869
2006	317.949	260.324		108.76	129.56		213.831	169.208		412.523	286.198
2007	318.285	260.438		107.155	144.439		211.987	158.903		413.971	287.283
2008	318.249	260.871		109.454	110.505		206.428	171.836		416.09	288.825
2009	318.135	259.992		107.304	134.505		213.564	162.416		418.839	291.33
2010	318.381	260.554		99.1805	125.221		221.181	172.565		421.381	292.375
2011	318.607	260.751		114.018	133.612		214.56	163.16		422.862	293.017
2012	318.503	260.152		88.1134	124.813		220.842	164.827		425.573	295.735
2013	319.228	260.668		93.6554	139.509		224.618	163.115		428.109	297.235
2014	318.066	260.54		106.995	142.479		215.231	159.959		430.432	297.965

## Sheet: N
remperature	north region	south region	precipitation	north region	south region	radiation	north region	south region	CO2	north region	south region
1981	321.162	263.086		99.6232	99.6232		257.133	188.144		313.344	253.565
1982	320.64	263.61		125.862	125.862		256.162	189.166		313.344	253.565
1983	320.227	263.51		108.921	108.921		258.11	193.647		313.344	253.565
1984	319.778	263.029		123.19	123.19		246.087	184.02		313.344	253.565
1985	320.111	263.276		98.3358	98.3358		259.232	189.742		313.344	253.565
1986	321.182	263.068		101.886	101.886		265.625	186.27		313.344	253.565
1987	321.749	263.331		129.405	129.405		262.154	190.957		313.344	253.565
1988	321.352	263.009		118.028	118.028		264.074	182.3		313.344	253.565
1989	321.139	263.269		133.846	133.846		253.603	190.12		313.344	253.565
1990	320.846	263.45		106.225	106.225		265.816	189.906		313.344	253.565
1991	321.141	262.994		86.0613	86.0613		272.13	188.552		313.344	253.565
1992	320.997	263.189		116.751	116.751		261.239	187.409		313.344	253.565
1993	322.272	263.121		140.45	140.45		263.773	190.627		313.344	253.565
1994	321.115	263.956		124.155	124.155		257.851	191.854		313.344	253.565
1995	320.741	262.906		106.72	106.72		264.188	191.551		313.344	253.565
1996	321.479	263.512		106.01	106.01		270.498	190.363		313.344	253.565
1997	321.105	263.891		121.978	121.978		257.915	187.236		313.344	253.565
1998	320.975	263.943		104.343	104.343		253.389	187.977		313.344	253.565
1999	321.53	263.661		119.621	119.621		256.695	188.267		313.344	253.565
2000	321.307	263.373		83.8361	83.8361		268.808	185.731		313.344	253.565
2001	321.268	264.389		115.317	115.317		252.842	198.128		313.344	253.565
2002	320.623	264.1		140.107	140.107		243.019	199.888		313.344	253.565
2003	321.154	263.323		99.8808	99.8808		258.703	182.553		313.344	253.565
2004	321.663	264.228		137.711	137.711		255.91	189.337		313.344	253.565
2005	321.706	263.528		97.3575	97.3575		264.52	182.203		313.344	253.565
2006	321.903	263.289		111.48	111.48		260.11	182.113		313.344	253.565
2007	321.307	263.532		139.2	139.2		242.2	184.679		313.344	253.565
2008	320.496	263.949		124.843	124.843		235.049	183.427		313.344	253.565
2009	321.773	263.479		99.9916	99.9916		258.416	182.452		313.344	253.565
2010	322.927	263.807		91.0351	91.0351		270.82	181.163		313.344	253.565
2011	321.903	263.67		116.891	116.891		248.069	177.808		313.344	253.565
2012	322.186	263.629		121.349	121.349		258.774	185.23		313.344	253.565
2013	322.046	264.258		121.356	121.356		259.34	191.514		313.344	253.565
2014	321.822	263.505		123.947	123.947		254.641	177.929		313.344	253.565

## Sheet: M
remperature	north region	south region	precipitation	north region	south region	radiation	north region	south region	CO2	north region	south region
1981	320.156	262.205		94.7246	150.197		254.835	207.353		376.415	231.365
1982	321.875	262.384		75.173	167.85		263.578	205.474		377.607	232.096
1983	320.891	262.309		88.6496	143.952		249.198	212.255		379.465	233.235
1984	320.517	262.49		98.8175	125.921		243.578	212.481		381.239	234.327
1985	320.371	262.452		88.1173	136.677		250.682	208.451		382.838	235.309
1986	320.476	262.755		91.7246	145.607		249.601	207.146		384.66	236.428
1987	320.289	262.152		75.2767	119.648		254.051	208.988		387.056	237.904
1988	321.495	262.454		83.0162	143.85		247.848	205.07		389.357	239.317
1989	320.77	261.946		95.8926	147.022		246.808	204.095		390.925	240.281
1990	321.212	262.962		95.8578	115.553		244.576	208.619		392.28	241.113
1991	320.304	262.387		86.0619	121.442		250.772	210.586		393.483	241.856
1992	319.992	262.142		83.2054	132.834		251.875	205.264		394.361	242.395
1993	321.177	262.504		93.1167	134.056		246.095	202.86		395.465	243.073
1994	320.451	262.526		94.5272	120.645		246.568	211.855		397.276	244.182
1995	320.474	261.915		82.5793	126.015		252.387	203.1		399.352	245.461
1996	321.528	262.752		91.5021	120.112		251.765	206.552		401.039	246.499
1997	321.307	262.183		98.5369	137.387		248.158	198.129		403.161	247.805
1998	321.033	262.181		71.4366	134.942		259.085	206.895		405.723	249.38
1999	322.569	262.544		70.7209	118.266		256.773	209.366		407.511	250.474
2000	320.927	262.52		89.1071	125.647		254.676	208.587		409.065	251.432
2001	321.291	263.077		109.987	146.562		251.63	206.607		411.092	252.681
2002	320.946	263.101		109.012	123.673		241.555	209.375		413.704	254.282
2003	321.056	262.58		77.8664	130.092		248.595	198.859		416.034	255.714
2004	321.251	262.588		111.989	138.568		237.773	195.324		417.953	256.898
2005	321.719	262.634		78.5965	150.183		252.208	195.474		420.168	258.262
2006	321.776	262.294		72.4719	114.532		243.497	195.317		422.231	259.524
2007	321.681	262.567		101.61	127.835		242.733	190.257		424.274	260.786
2008	320.538	263.228		115.581	108.825		233.333	203.15		426.331	262.045
2009	320.696	262.852		98.2181	131.312		247.581	201.767		428.494	263.377
2010	320.991	262.262		74.6154	139.262		255.787	189.641		431.086	264.967
2011	321.361	262.475		92.5275	121.228		243.839	196.773		433.465	266.432
2012	320.658	262.096		95.3883	142.78		247.325	188.063		436.089	268.047
2013	321.604	263.174		89.189	129.975		244.809	201.597		438.624	269.602
2014	322.325	263.214		94.023	119.732		236.334	192.894		440.94	271.026

## Sheet: B
remperature	north region	south region	precipitation	north region	south region	radiation	north region	south region	CO2	north region	south region
1981	319.184	261.345		77.7679	120.665		249.986	201.079		376.063	304.684
1982	318.802	261.824		78.9788	122.848		247.161	202.451		376.578	305.102
1983	318.811	261.473		92.1115	119.9		232.418	197.897		378.35	306.585
1984	318.343	261.707		86.3935	122.768		239.189	201.988		380.154	307.919
1985	317.718	261.043		104.909	122.47		236.114	187.911		381.961	309.326
1986	319.796	261.237		62.8384	124.178		256.699	197.599		383.563	310.685
1987	318.235	261.111		93.3574	129.07		242.916	196.866		385.255	312.103
1988	318.627	261.66		93.3177	117.774		232.307	198.473		388.223	314.568
1989	318.673	261.918		75.6943	133.254		243.056	196.826		389.889	316.085
1990	318.364	261.665		110.264	137.539		233.805	196.562		390.885	317.13
1991	317.05	261.143		91.643	144.447		230.128	184.512		392.885	318.41
1992	317.58	261.387		88.5913	123.803		236.869	194.324		393.523	319.077
1993	318.688	261.102		91.5114	138.476		233.533	185.003		394.093	319.669
1994	318.919	261.475		97.3718	127.665		234.372	198.378		396.18	321.203
1995	318.655	261.754		88.3408	109.782		242.606	199.248		397.995	322.962
1996	318.229	261.703		105.294	125.525		228.769	193.028		400.793	324.838
1997	318.052	261.397		103.642	131.553		228.901	186.06		401.466	325.726
1998	320	261.6		76.8374	128.14		250.3	192.239		404.7	328.227
1999	319.463	262.481		101.373	108.093		246.566	202.663		406.972	330.139
2000	318.895	261.861		98.1526	119.495		236.082	195.971		408.98	331.456
2001	320.121	261.674		80.3972	137.13		242.686	188.583		410.526	332.878
2002	319.024	261.632		87.3801	131.186		240.254	191.925		412.942	334.794
2003	318.168	261.415		104.105	150.223		230.036	188.628		416.705	337.542
2004	317.811	261.232		99.9645	141.815		222.84	191.572		417.936	338.716
2005	319.156	261.424		94.7131	139.668		234.098	182.2		420.145	340.527
2006	319.678	262.23		97.3943	117.321		237.22	194.914		422.895	342.675
2007	319.539	261.84		76.9541	123.584		246.213	197.202		424.319	343.997
2008	320.389	262.075		108.682	144.418		235.471	188.614		426.959	346.045
2009	318.508	261.785		85.7465	124.234		237.576	191.632		428.119	347.157
2010	319.387	261.903		114.569	133.137		222.933	187.169		432.086	350.14
2011	319.493	262.564		100.904	112.883		236.721	199.784		434.14	351.905
2012	319.826	261.797		73.5307	121.356		241.778	185.601		435.889	353.381
2013	319.359	261.932		89.2699	136.064		237.162	188.049		439.06	355.78
2014	318.22	260.616		70.3581	120.377		245.431	181.8		440.694	357.326

## Sheet: t
np	C	G	N	M	B	MME			sp		C	G	N	M	B	MME
1981	321.746	317.522	321.162	320.156	319.184	319.954				1981	264.086	260.037	263.086	262.205	261.345	262.152
1982	322.528	317.695	320.64	321.875	318.802	320.308				1982	264.019	260.362	263.61	262.384	261.824	262.44
1983	320.536	316.848	320.227	320.891	318.811	319.462				1983	263.732	259.922	263.51	262.309	261.473	262.189
1984	320.858	316.81	319.778	320.517	318.343	319.261				1984	263.592	259.443	263.029	262.49	261.707	262.052
1985	321.65	317.023	320.111	320.371	317.718	319.375				1985	263.669	259.763	263.276	262.452	261.043	262.041
1986	320.694	318.144	321.182	320.476	319.796	320.059				1986	263.963	259.602	263.068	262.755	261.237	262.125
1987	321.222	317.232	321.749	320.289	318.235	319.745				1987	263.497	259.844	263.331	262.152	261.111	261.987
1988	322.565	317.318	321.352	321.495	318.627	320.271				1988	264.137	260.132	263.009	262.454	261.66	262.278
1989	321.692	318.021	321.139	320.77	318.673	320.059				1989	264.601	260.197	263.269	261.946	261.918	262.386
1990	322.376	317.859	320.846	321.212	318.364	320.131				1990	263.971	260.319	263.45	262.962	261.665	262.473
1991	321.04	317.956	321.141	320.304	317.05	319.498				1991	263.573	260.038	262.994	262.387	261.143	262.027
1992	320.695	317.752	320.997	319.992	317.58	319.403				1992	263.177	259.696	263.189	262.142	261.387	261.918
1993	320.79	317.325	322.272	321.177	318.688	320.05				1993	263.329	259.865	263.121	262.504	261.102	261.984
1994	320.515	317.074	321.115	320.451	318.919	319.615				1994	263.436	260.162	263.956	262.526	261.475	262.311
1995	321.164	317.364	320.741	320.474	318.655	319.68				1995	263.639	259.612	262.906	261.915	261.754	261.965
1996	321.901	317.721	321.479	321.528	318.229	320.172				1996	264.125	259.937	263.512	262.752	261.703	262.406
1997	322.297	317.807	321.105	321.307	318.052	320.114				1997	264.174	260.17	263.891	262.183	261.397	262.363
1998	321.21	317.849	320.975	321.033	320	320.214				1998	264.075	260.106	263.943	262.181	261.6	262.381
1999	321.972	317.819	321.53	322.569	319.463	320.67				1999	263.456	260.008	263.661	262.544	262.481	262.43
2000	322.134	318.283	321.307	320.927	318.895	320.309				2000	263.79	260.04	263.373	262.52	261.861	262.317
2001	322.82	318.616	321.268	321.291	320.121	320.823				2001	264.131	260.527	264.389	263.077	261.674	262.76
2002	322.88	318.207	320.623	320.946	319.024	320.336				2002	264.354	260.503	264.1	263.101	261.632	262.738
2003	323.271	317.202	321.154	321.056	318.168	320.17				2003	264.214	260.421	263.323	262.58	261.415	262.391
2004	323.036	318.151	321.663	321.251	317.811	320.382				2004	264.399	260.243	264.228	262.588	261.232	262.538
2005	321.882	317.923	321.706	321.719	319.156	320.477				2005	263.95	260.754	263.528	262.634	261.424	262.458
2006	322.706	317.949	321.903	321.776	319.678	320.802				2006	264.589	260.324	263.289	262.294	262.23	262.545
2007	321.968	318.285	321.307	321.681	319.539	320.556				2007	264.001	260.438	263.532	262.567	261.84	262.476
2008	321.62	318.249	320.496	320.538	320.389	320.258				2008	264.018	260.871	263.949	263.228	262.075	262.828
2009	322.093	318.135	321.773	320.696	318.508	320.241				2009	264.226	259.992	263.479	262.852	261.785	262.467
2010	324.199	318.381	322.927	320.991	319.387	321.177				2010	264.553	260.554	263.807	262.262	261.903	262.616
2011	323.412	318.607	321.903	321.361	319.493	320.955				2011	264.041	260.751	263.67	262.475	262.564	262.7
2012	322.831	318.503	322.186	320.658	319.826	320.801				2012	264.132	260.152	263.629	262.096	261.797	262.361
2013	322.709	319.228	322.046	321.604	319.359	320.989				2013	264.368	260.668	264.258	263.174	261.932	262.88
2014	322.999	318.066	321.822	322.325	318.22	320.686				2014	264.865	260.54	263.505	263.214	260.616	262.548

## Sheet: p
np	C	G	N	M	B	MME		sp		C	G	N	M	B	MME
1981	123.935	109.454	99.6232	94.7246	77.7679	101.101			1981	171.258	144.879	99.6232	150.197	120.665	137.324
1982	125.127	104.686	125.862	75.173	78.9788	101.965			1982	157.632	144.18	125.862	167.85	122.848	143.674
1983	147.389	103.696	108.921	88.6496	92.1115	108.153			1983	163.75	123.957	108.921	143.952	119.9	132.096
1984	138.782	107.347	123.19	98.8175	86.3935	110.906			1984	177.981	150.547	123.19	125.921	122.768	140.081
1985	127.231	108.154	98.3358	88.1173	104.909	105.349			1985	211.623	140.111	98.3358	136.677	122.47	141.843
1986	144.687	83.4504	101.886	91.7246	62.8384	96.9172			1986	180.559	140.249	101.886	145.607	124.178	138.496
1987	131.893	108.544	129.405	75.2767	93.3574	107.695			1987	226.92	142.154	129.405	119.648	129.07	149.439
1988	130.899	106.643	118.028	83.0162	93.3177	106.381			1988	179.599	128.124	118.028	143.85	117.774	137.475
1989	156.42	120.015	133.846	95.8926	75.6943	116.374			1989	181.774	137.88	133.846	147.022	133.254	146.755
1990	132.113	100.984	106.225	95.8578	110.264	109.089			1990	160.244	132.33	106.225	115.553	137.539	130.378
1991	101.518	98.0737	86.0613	86.0619	91.643	92.6716			1991	155.96	143.523	86.0613	121.442	144.447	130.287
1992	136.496	91.1649	116.751	83.2054	88.5913	103.242			1992	206.772	124.3	116.751	132.834	123.803	140.892
1993	143.479	93.7746	140.45	93.1167	91.5114	112.466			1993	174.653	115.858	140.45	134.056	138.476	140.699
1994	115.98	105.016	124.155	94.5272	97.3718	107.41			1994	184.013	138.422	124.155	120.645	127.665	138.98
1995	135.499	99.0025	106.72	82.5793	88.3408	102.428			1995	170.649	142.972	106.72	126.015	109.782	131.228
1996	155.898	118.431	106.01	91.5021	105.294	115.427			1996	160.758	134.936	106.01	120.112	125.525	129.468
1997	143.125	107.144	121.978	98.5369	103.642	114.885			1997	187.467	144.059	121.978	137.387	131.553	144.489
1998	133.717	104.989	104.343	71.4366	76.8374	98.2645			1998	195.978	128.049	104.343	134.942	128.14	138.291
1999	124.99	103.576	119.621	70.7209	101.373	104.056			1999	223.972	133.184	119.621	118.266	108.093	140.627
2000	123.705	90.8436	83.8361	89.1071	98.1526	97.1288			2000	177.595	145.132	83.8361	125.647	119.495	130.341
2001	117.79	83.8064	115.317	109.987	80.3972	101.459			2001	163.694	106.34	115.317	146.562	137.13	133.808
2002	110.328	116.865	140.107	109.012	87.3801	112.738			2002	192.756	137.499	140.107	123.673	131.186	145.044
2003	123.713	105.189	99.8808	77.8664	104.105	102.151			2003	168.868	113.738	99.8808	130.092	150.223	132.56
2004	147.888	87.0141	137.711	111.989	99.9645	116.913			2004	160.762	134.898	137.711	138.568	141.815	142.751
2005	123.629	110.952	97.3575	78.5965	94.7131	101.05			2005	172.022	119.466	97.3575	150.183	139.668	135.739
2006	140.993	108.76	111.48	72.4719	97.3943	106.22			2006	173.767	129.56	111.48	114.532	117.321	129.332
2007	109.366	107.155	139.2	101.61	76.9541	106.857			2007	193.151	144.439	139.2	127.835	123.584	145.642
2008	131.287	109.454	124.843	115.581	108.682	117.969			2008	182.713	110.505	124.843	108.825	144.418	134.261
2009	143.288	107.304	99.9916	98.2181	85.7465	106.91			2009	226.906	134.505	99.9916	131.312	124.234	143.39
2010	128.857	99.1805	91.0351	74.6154	114.569	101.651			2010	161.277	125.221	91.0351	139.262	133.137	129.986
2011	118.551	114.018	116.891	92.5275	100.904	108.578			2011	166.583	133.612	116.891	121.228	112.883	130.239
2012	121.928	88.1134	121.349	95.3883	73.5307	100.062			2012	174.138	124.813	121.349	142.78	121.356	136.887
2013	143.196	93.6554	121.356	89.189	89.2699	107.333			2013	201.062	139.509	121.356	129.975	136.064	145.593
2014	173.584	106.995	123.947	94.023	70.3581	113.781			2014	166.398	142.479	123.947	119.732	120.377	134.587

## Sheet: r
np	C	G	N	M	B	MME		sp		C	G	N	M	B	MME
1981	264.291	223.55	257.133	254.835	249.986	249.959			1981	192.037	178.221	188.144	207.353	201.079	193.367
1982	263.368	235.205	256.162	263.578	247.161	253.095			1982	198.772	180.52	189.166	205.474	202.451	195.277
1983	250.945	229.878	258.11	249.198	232.418	244.11			1983	190.925	181.199	193.647	212.255	197.897	195.184
1984	250.541	228.756	246.087	243.578	239.189	241.63			1984	190.138	174.557	184.02	212.481	201.988	192.637
1985	264.897	225.561	259.232	250.682	236.114	247.297			1985	181.73	180.785	189.742	208.451	187.911	189.724
1986	256.191	239.312	265.625	249.601	256.699	253.485			1986	188.807	171.505	186.27	207.146	197.599	190.266
1987	253.306	232.135	262.154	254.051	242.916	248.913			1987	173.696	176.788	190.957	208.988	196.866	189.459
1988	259.086	227.468	264.074	247.848	232.307	246.157			1988	192.262	176.605	182.3	205.07	198.473	190.942
1989	254.686	225.971	253.603	246.808	243.056	244.825			1989	193.89	176.571	190.12	204.095	196.826	192.301
1990	258.905	227.326	265.816	244.576	233.805	246.086			1990	193.911	179.612	189.906	208.619	196.562	193.722
1991	258.956	228.476	272.13	250.772	230.128	248.092			1991	188.842	170.55	188.552	210.586	184.512	188.609
1992	247.066	227.519	261.239	251.875	236.869	244.914			1992	175.358	176.488	187.409	205.264	194.324	187.768
1993	251.827	231.227	263.773	246.095	233.533	245.291			1993	185.987	180.648	190.627	202.86	185.003	189.025
1994	251.965	224.551	257.851	246.568	234.372	243.061			1994	182.256	170.666	191.854	211.855	198.378	191.002
1995	253.171	222.492	264.188	252.387	242.606	246.969			1995	184.826	167.089	191.551	203.1	199.248	189.163
1996	254.183	222.373	270.498	251.765	228.769	245.517			1996	186.109	175.424	190.363	206.552	193.028	190.295
1997	254.123	220.546	257.915	248.158	228.901	241.928			1997	190.839	171.291	187.236	198.129	186.06	186.711
1998	248.112	224.665	253.389	259.085	250.3	247.11			1998	182.258	176.342	187.977	206.895	192.239	189.142
1999	259.219	221.055	256.695	256.773	246.566	248.061			1999	177.297	171.175	188.267	209.366	202.663	189.753
2000	252.456	234.012	268.808	254.676	236.082	249.207			2000	186.782	172.66	185.731	208.587	195.971	189.946
2001	264.263	233.117	252.842	251.63	242.686	248.907			2001	196.469	183.328	198.128	206.607	188.583	194.623
2002	262.154	219.134	243.019	241.555	240.254	241.223			2002	187.517	175.766	199.888	209.375	191.925	192.894
2003	247.355	206.284	258.703	248.595	230.036	238.194			2003	190.484	182.603	182.553	198.859	188.628	188.625
2004	252.613	224.934	255.91	237.773	222.84	238.814			2004	187.852	161.772	189.337	195.324	191.572	185.172
2005	256.896	214.417	264.52	252.208	234.098	244.428			2005	183.719	172.599	182.203	195.474	182.2	183.239
2006	244.924	213.831	260.11	243.497	237.22	239.916			2006	188.868	169.208	182.113	195.317	194.914	186.084
2007	254.594	211.987	242.2	242.733	246.213	239.545			2007	182.837	158.903	184.679	190.257	197.202	182.776
2008	248.279	206.428	235.049	233.333	235.471	231.712			2008	181.325	171.836	183.427	203.15	188.614	185.67
2009	248.15	213.564	258.416	247.581	237.576	241.057			2009	177.486	162.416	182.452	201.767	191.632	183.151
2010	251.206	221.181	270.82	255.787	222.933	244.385			2010	190.041	172.565	181.163	189.641	187.169	184.116
2011	251.866	214.56	248.069	243.839	236.721	239.011			2011	186.505	163.16	177.808	196.773	199.784	184.806
2012	258.576	220.842	258.774	247.325	241.778	245.459			2012	177.559	164.827	185.23	188.063	185.601	180.256
2013	251.765	224.618	259.34	244.809	237.162	243.539			2013	180.914	163.115	191.514	201.597	188.049	185.038
2014	237.451	215.231	254.641	236.334	245.431	237.818			2014	185.574	159.959	177.929	192.894	181.8	179.631

## Sheet: o
np	C	G	N	M	B	MME		sp		C	G	N	M	B	MME
1981	420.216	368.928	313.344	376.415	376.063	370.993			1981	277.85	256.915	253.565	231.365	304.684	264.876
1982	421.41	371.995	313.344	377.607	376.578	372.187			1982	278.884	258.372	253.565	232.096	305.102	265.604
1983	423.014	372.312	313.344	379.465	378.35	373.297			1983	280.143	258.311	253.565	233.235	306.585	266.368
1984	425.199	373.496	313.344	381.239	380.154	374.686			1984	281.086	259.029	253.565	234.327	307.919	267.185
1985	426.395	375.67	313.344	382.838	381.961	376.042			1985	282.018	260.465	253.565	235.309	309.326	268.137
1986	428.531	377.192	313.344	384.66	383.563	377.458			1986	283.42	261.411	253.565	236.428	310.685	269.102
1987	430.961	378.747	313.344	387.056	385.255	379.073			1987	284.946	262.481	253.565	237.904	312.103	270.2
1988	432.086	380.373	313.344	389.357	388.223	380.677			1988	285.976	264.473	253.565	239.317	314.568	271.58
1989	434.763	382.321	313.344	390.925	389.889	382.248			1989	287.452	265.16	253.565	240.281	316.085	272.509
1990	435.477	384.926	313.344	392.28	390.885	383.382			1990	288.493	267.776	253.565	241.113	317.13	273.615
1991	437.45	386.98	313.344	393.483	392.885	384.828			1991	289.559	268.211	253.565	241.856	318.41	274.32
1992	439.447	388.589	313.344	394.361	393.523	385.853			1992	290.687	269.103	253.565	242.395	319.077	274.965
1993	441.147	388.13	313.344	395.465	394.093	386.436			1993	291.674	269.265	253.565	243.073	319.669	275.449
1994	441.987	390.082	313.344	397.276	396.18	387.774			1994	292.349	270.954	253.565	244.182	321.203	276.451
1995	443.692	391.564	313.344	399.352	397.995	389.189			1995	293.546	271.864	253.565	245.461	322.962	277.48
1996	445.214	392.094	313.344	401.039	400.793	390.497			1996	294.614	271.952	253.565	246.499	324.838	278.294
1997	447.146	393.232	313.344	403.161	401.466	391.67			1997	295.968	272.696	253.565	247.805	325.726	279.152
1998	449.011	395.639	313.344	405.723	404.7	393.683			1998	296.879	274.824	253.565	249.38	328.227	280.575
1999	450.697	398.082	313.344	407.511	406.972	395.321			1999	297.904	275.818	253.565	250.474	330.139	281.58
2000	452.685	400.109	313.344	409.065	408.98	396.837			2000	299.466	277.892	253.565	251.432	331.456	282.762
2001	453.594	402.832	313.344	411.092	410.526	398.278			2001	300.387	280.102	253.565	252.681	332.878	283.922
2002	456.808	404.814	313.344	413.704	412.942	400.322			2002	302.148	280.75	253.565	254.282	334.794	285.108
2003	459.501	405.635	313.344	416.034	416.705	402.244			2003	303.396	281.342	253.565	255.714	337.542	286.312
2004	461.619	408.441	313.344	417.953	417.936	403.858			2004	305.322	283.699	253.565	256.898	338.716	287.64
2005	463.136	410.599	313.344	420.168	420.145	405.478			2005	306.941	284.869	253.565	258.262	340.527	288.833
2006	466.67	412.523	313.344	422.231	422.895	407.533			2006	308.544	286.198	253.565	259.524	342.675	290.101
2007	467.893	413.971	313.344	424.274	424.319	408.76			2007	310.021	287.283	253.565	260.786	343.997	291.13
2008	471.178	416.09	313.344	426.331	426.959	410.78			2008	312.165	288.825	253.565	262.045	346.045	292.529
2009	473.984	418.839	313.344	428.494	428.119	412.556			2009	313.583	291.33	253.565	263.377	347.157	293.802
2010	477.007	421.381	313.344	431.086	432.086	414.981			2010	315.775	292.375	253.565	264.967	350.14	295.365
2011	480.446	422.862	313.344	433.465	434.14	416.851			2011	317.735	293.017	253.565	266.432	351.905	296.531
2012	484.541	425.573	313.344	436.089	435.889	419.087			2012	320.591	295.735	253.565	268.047	353.381	298.264
2013	488.049	428.109	313.344	438.624	439.06	421.437			2013	323.054	297.235	253.565	269.602	355.78	299.847
2014	490.393	430.432	313.344	440.94	440.694	423.161			2014	324.97	297.965	253.565	271.026	357.326	300.97

## Sheet: MME
np	t	p	r	o	ccf		t	p	r	o	ccf
1981	319.954	101.101	249.959	370.993	360.27		262.152	137.324	193.367	264.876	171.25
1982	320.308	101.965	253.095	372.187	362.31		262.44	143.674	195.277	265.604	172.33
1983	319.462	108.153	244.11	373.297	358.66		262.189	132.096	195.184	266.368	172.03
1984	319.261	110.906	241.63	374.686	357.97		262.052	140.081	192.637	267.185	170.56
1985	319.375	105.349	247.297	376.042	359.87		262.041	141.843	189.724	268.137	168.89
1986	320.059	96.9172	253.485	377.458	361.8		262.125	138.496	190.266	269.102	169.07
1987	319.745	107.695	248.913	379.073	361.62		261.987	149.439	189.459	270.2	168.52
1988	320.271	106.381	246.157	380.677	360.41		262.278	137.475	190.942	271.58	169.19
1989	320.059	116.374	244.825	382.248	361.75		262.386	146.755	192.301	272.509	169.9
1990	320.131	109.089	246.086	383.382	361.07		262.473	130.378	193.722	273.615	170.46
1991	319.498	92.6716	248.092	384.828	358.55		262.027	130.287	188.609	274.32	167.47
1992	319.403	103.242	244.914	385.853	359.1		261.918	140.892	187.768	274.965	166.96
1993	320.05	112.466	245.291	386.436	361.55		261.984	140.699	189.025	275.449	167.6
1994	319.615	107.41	243.061	387.774	359.29		262.311	138.98	191.002	276.451	168.65
1995	319.68	102.428	246.969	389.189	360.4		261.965	131.228	189.163	277.48	167.36
1996	320.172	115.427	245.517	390.497	362.67		262.406	129.468	190.295	278.294	168.03
1997	320.114	114.885	241.928	391.67	360.83		262.363	144.489	186.711	279.152	166.08
1998	320.214	98.2645	247.11	393.683	360.33		262.381	138.291	189.142	280.575	167.18
1999	320.67	104.056	248.061	395.321	362.36		262.43	140.627	189.753	281.58	167.42
2000	320.309	97.1288	249.207	396.837	361.47		262.317	130.341	189.946	282.762	167.27
2001	320.823	101.459	248.907	398.278	362.6		262.76	133.808	194.623	283.922	169.83
2002	320.336	112.738	241.223	400.322	360.9		262.738	145.044	192.894	285.108	168.82
2003	320.17	102.151	238.194	402.244	357.33		262.391	132.56	188.625	286.312	166.18
2004	320.382	116.913	238.814	403.858	360.85		262.538	142.751	185.172	287.64	164.28
2005	320.477	101.05	244.428	405.478	360.68		262.458	135.739	183.239	288.833	163.03
2006	320.802	106.22	239.916	407.533	359.82		262.545	129.332	186.084	290.101	164.39
2007	320.556	106.857	239.545	408.76	359.72		262.476	145.642	182.776	291.13	162.57
2008	320.258	117.969	231.712	410.78	358.02		262.828	134.261	185.67	292.529	164.02
2009	320.241	106.91	241.057	412.556	360.62		262.467	143.39	183.151	293.802	162.43
2010	321.177	101.651	244.385	414.981	361.98		262.616	129.986	184.116	295.365	162.73
2011	320.955	108.578	239.011	416.851	360.7		262.7	130.239	184.806	296.531	163
2012	320.801	100.062	245.459	419.087	362.33		262.361	136.887	180.256	298.264	160.26
2013	320.989	107.333	243.539	421.437	363.13		262.88	145.593	185.038	299.847	162.88
2014	320.686	113.781	237.818	423.161	361.52		262.548	134.587	179.631	300.97	159.65
